# Supplementary material
Source: Springer Nature journal article supplement (https://www.springermedizin.de/resource/supplementary/12885_2010_2472_MOESM1_ESM.pdf/9461386)
Supplement: MOESM1 [file 9461386]

Patients with primary breast or colon cancer who are scheduled to undergo adjuvant chemotherapy

Patients not eligible

Patients not willing to participate

Invitation to participate in a one time survey

T0 measurement  
*before start chemotherapy*

Randomization

Onco-Move

OnTrack

Usual care

T1 measurement  
*end of chemotherapy*

T2 measurement  
*6 months after end of chemotherapy*
